# Supplementary material for: Eco-friendly microwave synthesis of Mg(ii) phenoxy carboxylic acid coordination compounds with specific motifs driven by multiple hydrogen bonding
Source: Royal Society of Chemistry journal article supplement (doi:10.1039/c6ra09589e), 2016-01-01

**Table S1.** Thermal decomposition data of the title compounds **1-4**

| Complex  | Stage | Weight loss process                                             | Temperature Range (°C) | Mass loss rate/% |       | Final solid products |       |
|----------|-------|-----------------------------------------------------------------|------------------------|------------------|-------|----------------------|-------|
|          |       |                                                                 |                        | Found            | calcd | Found                | calcd |
| <b>1</b> | I     | (H <sub>2</sub> O) <sub>4</sub>                                 | 25.00~157.33           | 15.50            | 15.40 | MgO                  |       |
|          | II    | collapse                                                        | 157.33~318.39          | 74.90            | 75.98 | 9.60                 | 8.62  |
|          | III   | collapse                                                        | 318.39~581.38          |                  |       |                      |       |
| <b>2</b> | I     | (H <sub>2</sub> O) <sub>6</sub>                                 | 25.00~179.47           | 20.22            | 20.32 | MgO                  |       |
|          | II    | collapse                                                        | 179.47~376.31          | 72.15            | 72.10 | 7.63                 | 7.58  |
|          | III   | collapse                                                        | 376.31~561.96          |                  |       |                      |       |
| <b>3</b> | I     | (H <sub>2</sub> O) <sub>5</sub>                                 | 25.00~209.05           | 16.12            | 16.23 | MgO                  |       |
|          | II    | collapse                                                        | 209.05~494.26          | 76.4             | 76.5  | 7.48                 | 7.27  |
|          | III   | collapse                                                        | 494.26~730.86          |                  |       |                      |       |
| <b>4</b> | I     | (H <sub>2</sub> O) <sub>4</sub> (H <sub>2</sub> O) <sub>2</sub> | 25.00~182.76           | 16.85            | 16.84 | MgO                  |       |
|          | II    | collapse                                                        | 182.76~456.60          | 76.83            | 76.88 | 6.59                 | 6.28  |
|          | III   | collapse                                                        | 456.60~706.18          |                  |       |                      |       |

**Table S2.** Crystallographic data and structure refinement parameters for **1-4**

| Compound          | <b>1</b>                                                          | <b>2</b>                                                          | <b>3</b>                                                          | <b>4</b>                                                          |
|-------------------|-------------------------------------------------------------------|-------------------------------------------------------------------|-------------------------------------------------------------------|-------------------------------------------------------------------|
| Empirical formula | C <sub>16</sub> H <sub>20</sub> Cl <sub>2</sub> MgO <sub>10</sub> | C <sub>18</sub> H <sub>28</sub> Cl <sub>2</sub> MgO <sub>12</sub> | C <sub>16</sub> H <sub>20</sub> Cl <sub>4</sub> MgO <sub>11</sub> | C <sub>16</sub> H <sub>20</sub> Cl <sub>6</sub> MgO <sub>12</sub> |
| Formula weight    | 467.53                                                            | 531.61                                                            | 554.43                                                            | 641.33                                                            |
| Temperature (K)   | 298(2)                                                            | 298(2)                                                            | 298(2)                                                            | 298(2)                                                            |
| Crystal system    | Monoclinic                                                        | Monoclinic                                                        | Triclinic                                                         | Monoclinic                                                        |
| Space group       | <i>P2</i> (1)                                                     | <i>C2/c</i>                                                       | <i>P</i> -1                                                       | <i>P2</i> (1)/ <i>c</i>                                           |
| <i>a</i> , Å      | 5.1840(10)                                                        | 32.25(2)                                                          | 7.379(5)                                                          | 6.8882(14)                                                        |
| <i>b</i> , Å      | 27.263(3)                                                         | 7.404(4)                                                          | 7.494(5)                                                          | 8.7091(18)                                                        |
| <i>c</i> , Å      | 7.4050(10)                                                        | 10.322(6)                                                         | 20.56(1)                                                          | 44.043(9)                                                         |
| $\alpha$ (°)      | 90                                                                | 90.00                                                             | 92.8(1)                                                           | 90                                                                |

|                                                                            |                                                                 |                                                                 |                                                                 |                                                                 |
|----------------------------------------------------------------------------|-----------------------------------------------------------------|-----------------------------------------------------------------|-----------------------------------------------------------------|-----------------------------------------------------------------|
| $\beta$ (°)                                                                | 107.443(2)                                                      | 101.511(8)                                                      | 92.5(1)                                                         | 94.482(5)                                                       |
| $\gamma$ (°)                                                               | 90                                                              | 90.00                                                           | 90.94(1)                                                        | 90                                                              |
| Volume (Å <sup>3</sup> )                                                   | 998.4(3)                                                        | 2415(2)                                                         | 1134.0(2)                                                       | 2634.1(9)                                                       |
| <i>Z</i>                                                                   | 2                                                               | 4                                                               | 2                                                               | 4                                                               |
| $D_c/g\cdot cm^{-3}$                                                       | 1.555                                                           | 1.462                                                           | 1.624                                                           | 1.617                                                           |
| $\mu$ , mm <sup>-1</sup>                                                   | 0.409                                                           | 0.354                                                           | 0.605                                                           | 0.732                                                           |
| <i>F</i> (000)                                                             | 484                                                             | 1112                                                            | 568                                                             | 1304                                                            |
| Crystal size (mm)                                                          | 0.50×0.48×0.42                                                  | 0.30×0.30×0.22                                                  | 0.28×0.21×0.13                                                  | 0.18×0.12×0.08                                                  |
|                                                                            | -6≤ <i>h</i> ≤6                                                 | -38≤ <i>h</i> ≤38                                               | -8≤ <i>h</i> ≤8                                                 | -8≤ <i>h</i> ≤9                                                 |
| Index range                                                                | -36≤ <i>k</i> ≤27                                               | -8≤ <i>k</i> ≤8                                                 | -9≤ <i>k</i> ≤7                                                 | -11≤ <i>k</i> ≤11                                               |
|                                                                            | -9≤ <i>l</i> ≤9                                                 | -12≤ <i>l</i> ≤6                                                | -24≤ <i>l</i> ≤25                                               | -51≤ <i>l</i> ≤58                                               |
| Reflections collected                                                      | 7017                                                            | 6129                                                            | 6149                                                            | 18311                                                           |
| Unique reflections                                                         | 3674                                                            | 2252                                                            | 4130                                                            | 6616                                                            |
| <i>R</i> (int)                                                             | 0.0365                                                          | 0.0474                                                          | 0.0643                                                          | 0.0483                                                          |
| Completeness (%)                                                           | 100.0                                                           | 99.5                                                            | 99.4                                                            | 99.4                                                            |
| Data/restraints/<br>parameters                                             | 3674/1/262                                                      | 2252/0/153                                                      | 4130/0/291                                                      | 6616/0/316                                                      |
| GoF on <i>F</i> <sup>2</sup>                                               | 1.020                                                           | 1.096                                                           | 1.059                                                           | 1.080                                                           |
| <i>R</i> <sub>1</sub> , <i>wR</i> <sub>2</sub> [ <i>I</i> >2σ( <i>I</i> )] | <i>R</i> <sub>1</sub> =0.0347<br><i>wR</i> <sub>2</sub> =0.0970 | <i>R</i> <sub>1</sub> =0.0867<br><i>wR</i> <sub>2</sub> =0.2536 | <i>R</i> <sub>1</sub> =0.0687<br><i>wR</i> <sub>2</sub> =0.2196 | <i>R</i> <sub>1</sub> =0.0557<br><i>wR</i> <sub>2</sub> =0.1545 |
| <i>R</i> <sub>1</sub> , <i>wR</i> <sub>2</sub> (all data)                  | <i>R</i> <sub>1</sub> =0.0359                                   | <i>R</i> <sub>1</sub> =0.1109                                   | <i>R</i> <sub>1</sub> =0.0718                                   | <i>R</i> <sub>1</sub> =0.0685                                   |

|                                                                      |                  |                  |                  |                  |
|----------------------------------------------------------------------|------------------|------------------|------------------|------------------|
|                                                                      | $wR_2=0.0981$    | $wR_2=0.2662$    | $wR_2=0.2418$    | $wR_2=0.1666$    |
| $\Delta\rho_{\max}, \Delta\rho_{\min}(\text{e}\cdot\text{\AA}^{-3})$ | 0.301 and -0.368 | 0.616 and -0.517 | 0.724 and -0.666 | 0.340 and -0.382 |

**Table S3.** Bond lengths ( $\text{\AA}$ ) and angles ( $^\circ$ ) of hydrogen bond for **1–4**

| $D-H\cdots A$         | $d(D-H)$ | $d(H\cdots A)$ | $d(D\cdots A)$ | $\angle DHA$ |
|-----------------------|----------|----------------|----------------|--------------|
| <b>1</b>              |          |                |                |              |
| O1W–H1WB $\cdots$ O2  | 0.96     | 1.74           | 2.664(2)       | 161          |
| O3W–H3WB $\cdots$ O5  | 0.96     | 1.90           | 2.712(2)       | 140          |
| <b>2</b>              |          |                |                |              |
| O1W–H1WB $\cdots$ O1  | 0.69     | 2.00           | 2.679(5)       | 167          |
| O2W–H2WB $\cdots$ O3  | 0.93     | 2.49           | 3.309(6)       | 147          |
| O3W–H3WA $\cdots$ O3  | 0.95     | 1.90           | 2.799(5)       | 156          |
| O3W–H3WB $\cdots$ O2  | 0.92     | 1.67           | 2.569(5)       | 163          |
| <b>3</b>              |          |                |                |              |
| O2W–H2WA $\cdots$ Cl3 | 0.96     | 2.63           | 3.472(7)       | 147          |
| O2W–H2WB $\cdots$ O4  | 0.96     | 1.90           | 2.860(10)      | 176          |
| O3W–H3WA $\cdots$ O4  | 0.96     | 1.74           | 2.619(9)       | 150          |
| O3W–H3WB $\cdots$ O4W | 0.96     | 2.01           | 2.835(9)       | 143          |
| <b>4</b>              |          |                |                |              |
| O1W–H1WA $\cdots$ O2  | 0.96     | 1.81           | 2.732(3)       | 161          |
| O1W–H1WB $\cdots$ O3W | 0.96     | 1.92           | 2.805(3)       | 152          |
| O4W–H4WB $\cdots$ O1  | 0.96     | 1.84           | 2.778(3)       | 166          |
| O4W–H4WB $\cdots$ O1W | 0.96     | 1.74           | 2.619(9)       | 150          |

**Table S4.** Selected bond lengths (Å) and angles (°) for **1-4**

---

| <b>1</b>             |            |                      |            |
|----------------------|------------|----------------------|------------|
| Mg(1)-O(1W)          | 2.0363(16) | Mg(1)-O(3W)          | 2.0400(17) |
| Mg(1)-O(1)           | 2.0701(17) | Mg(1)-O(4)           | 2.0804(17) |
| Mg(1)-O(2W)          | 2.0956(18) | Mg(1)-O(4W)          | 2.1048(18) |
| O(1W)-Mg(1)-O(3W)    | 179.44(9)  | O(1W)-Mg(1)-O(1)     | 86.86(7)   |
| O(3W)-Mg(1)-O(1)     | 92.75(7)   | O(1W)-Mg(1)-O(4)     | 93.22(7)   |
| O(3W)-Mg(1)-O(4)     | 87.16(7)   | O(1)-Mg(1)-O(4)      | 179.84(8)  |
| O(1W)-Mg(1)-O(2W)    | 90.20(7)   | O(3W)-Mg(1)-O(2W)    | 89.39(7)   |
| O(1)-Mg(1)-O(2W)     | 87.21(7)   | O(4)-Mg(1)-O(2W)     | 92.93(7)   |
| O(1W)-Mg(1)-O(4W)    | 89.37(7)   | O(3W)-Mg(1)-O(4W)    | 91.06(7)   |
| O(1)-Mg(1)-O(4W)     | 93.47(7)   | O(4)-Mg(1)-O(4W)     | 86.39(7)   |
| O(2W)-Mg(1)-O(4W)    | 179.17(8)  |                      |            |
| <b>2</b>             |            |                      |            |
| Mg(1)-O(2W)A         | 2.031(4)   | Mg(1)-O(1W)A         | 2.041(4)   |
| Mg(1)-O(2W)          | 2.031(4)   | Mg(1)-O(3W)A         | 2.073(3)   |
| Mg(1)-O(1W)          | 2.041(4)   | Mg(1)-O(3W)          | 2.073(3)   |
| O(2W)A-Mg(1)-O(2W)   | 86.2(2)    | O(1W)-Mg(1)-O(3W)A   | 86.06(15)  |
| O(2W)A-Mg(1)-O(1W)   | 177.23(15) | O(1W)A -Mg(1)-O(3W)A | 90.30(15)  |
| O(2W)-Mg(1)-O(1W)    | 93.30(14)  | O(2W)A -Mg(1)-O(3W)  | 92.43(15)  |
| O(2W)A-Mg(1)-O(1W)A  | 93.30(14)  | O(2W)-Mg(1)-O(3W)    | 91.23(15)  |
| O(2W)-Mg(1)-O(1W)A   | 177.23(15) | O(1W)-Mg(1)-O(3W)    | 90.30(15)  |
| O(1W)-Mg(1)-O(1W)A   | 87.3(2)    | O(1W)A -Mg(1)-O(3W)  | 86.06(15)  |
| O(2W)A -Mg(1)-O(3W)A | 91.23(15)  | O(3W)A -Mg(1)-O(3W)  | 175.0(2)   |
| O(2W)-Mg(1)-O(3W)A   | 92.43(15)  |                      |            |
| <b>3</b>             |            |                      |            |
| Mg(1)-O(1)           | 2.035(5)   | Mg(1)-O(2W)          | 2.091(7)   |
| Mg(1)-O(3W)          | 2.060(6)   | Mg(1)-O(4W)          | 2.095(6)   |

---

|                   |            |                   |            |
|-------------------|------------|-------------------|------------|
| Mg(1)-O(1W)       | 2.063(6)   | Mg(1)-O(5W)       | 2.098(6)   |
| O(1)-Mg(1)-O(3W)  | 99.5(2)    | O(1W)-Mg(1)-O(4W) | 88.5(3)    |
| O(1)-Mg(1)-O(1W)  | 81.9(2)    | O(2W)-Mg(1)-O(4W) | 174.9(3)   |
| O(3W)-Mg(1)-O(1W) | 177.0(3)   | O(1)-Mg(1)-O(5W)  | 171.2(3)   |
| O(1)-Mg(1)-O(2W)  | 93.1(3)    | O(3W)-Mg(1)-O(5W) | 89.1(2)    |
| O(3W)-Mg(1)-O(2W) | 86.7(3)    | O(1W)-Mg(1)-O(5W) | 89.4(2)    |
| O(1W)-Mg(1)-O(2W) | 95.8(3)    | O(2W)-Mg(1)-O(5W) | 89.0(3)    |
| O(1)-Mg(1)-O(4W)  | 90.1(3)    | O(4W)-Mg(1)-O(5W) | 88.4(3)    |
| O(3W)-Mg(1)-O(4W) | 88.9(3)    |                   |            |
| <b>4</b>          |            |                   |            |
| Mg(1)-O(4)        | 2.042(2)   | Mg(1)-O(2W)       | 2.056(3)   |
| Mg(1)-O(1)        | 2.046(2)   | Mg(1)-O(4W)       | 2.098(3)   |
| Mg(1)-O(1W)       | 2.054(2)   | Mg(1)-O(3W)       | 2.157(3)   |
| O(4)-Mg(1)-O(1)   | 96.23(10)  | O(2W)-Mg(1)-O(4W) | 83.54(10)  |
| O(4)-Mg(1)-O(1W)  | 168.92(11) | O(4)-Mg(1)-O(3W)  | 89.26(11)  |
| O(1)-Mg(1)-O(1W)  | 90.09(9)   | O(1)-Mg(1)-O(3W)  | 83.16(11)  |
| O(4)-Mg(1)-O(2W)  | 93.54(12)  | O(1W)-Mg(1)-O(3W) | 88.84(11)  |
| O(1)-Mg(1)-O(2W)  | 88.74(11)  | O(2W)-Mg(1)-O(3W) | 87.90(11)  |
| O(1W)-Mg(1)-O(2W) | 95.69(12)  | O(4W)-Mg(1)-O(3W) | 175.68(12) |
| O(4)-Mg(1)-O(4W)  | 90.49(10)  | O(1)-Mg(1)-O(4W)  | 173.09(10) |

---

Symmetry transformations used to generate equivalent atoms. For **2A**  $-x,y,-z+1/2$

IR spectra of compound 1

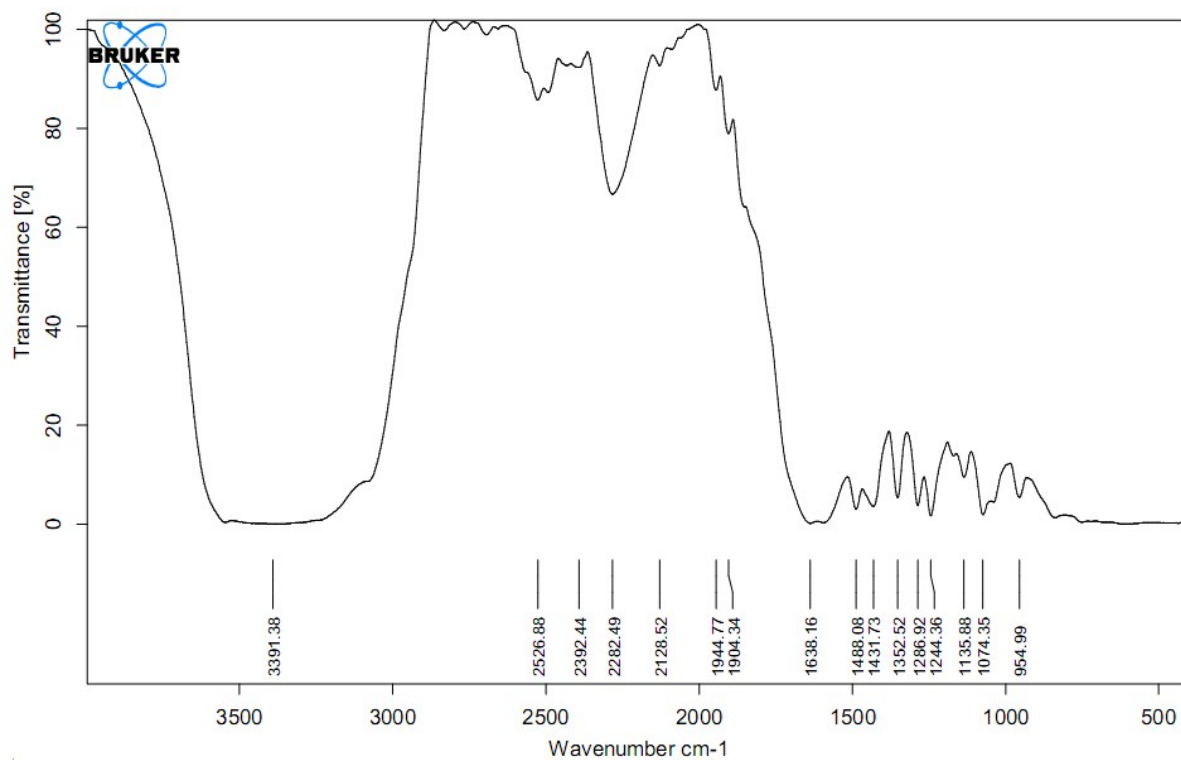

IR spectra of compound 2

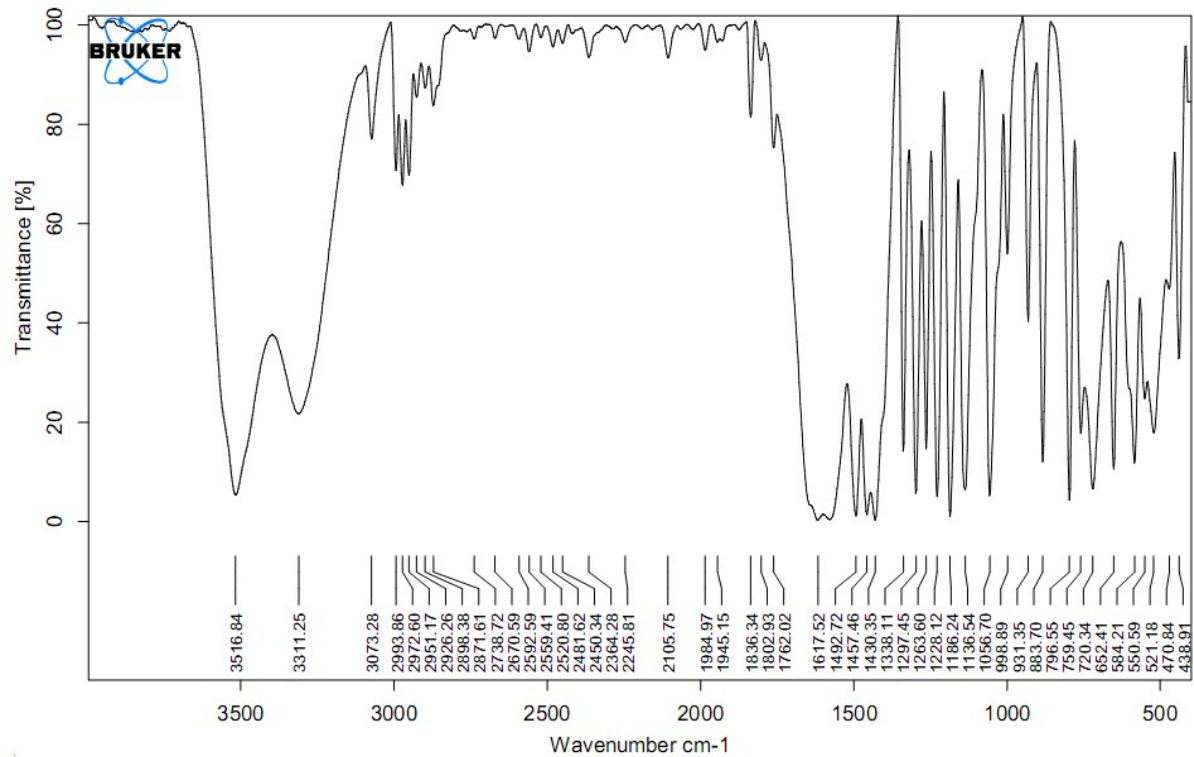

### IR spectra of compound 3

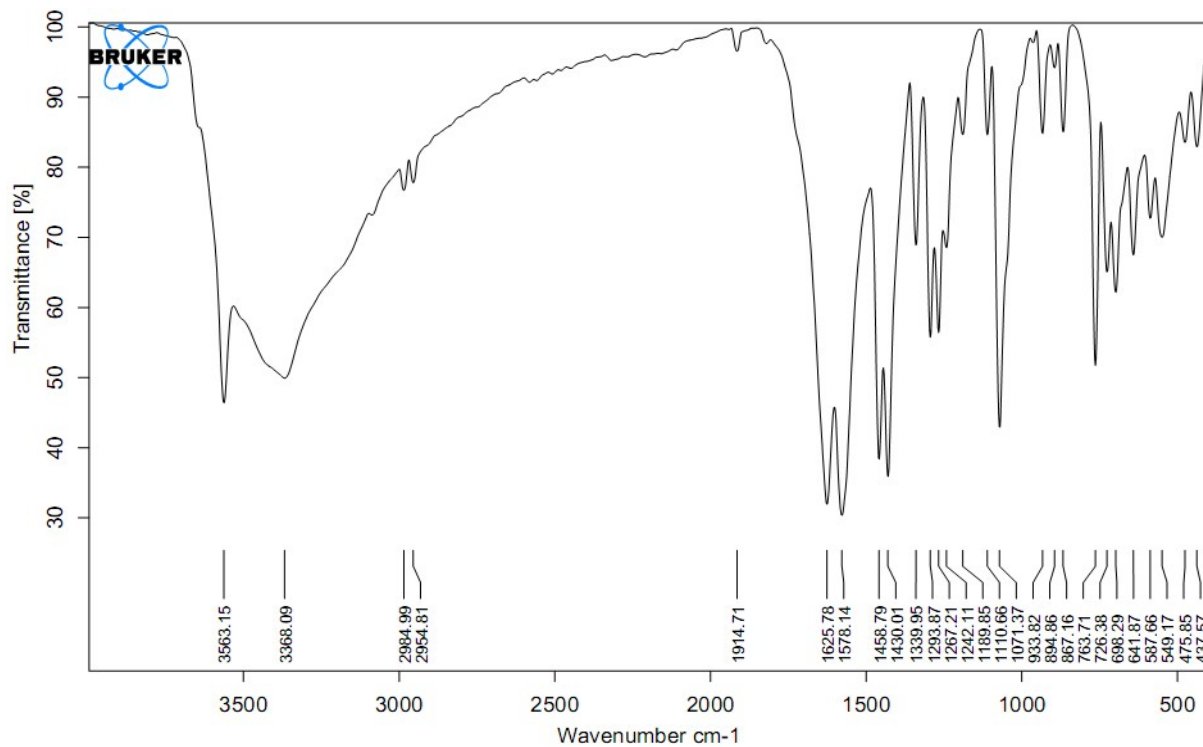

### IR spectra of compound 4

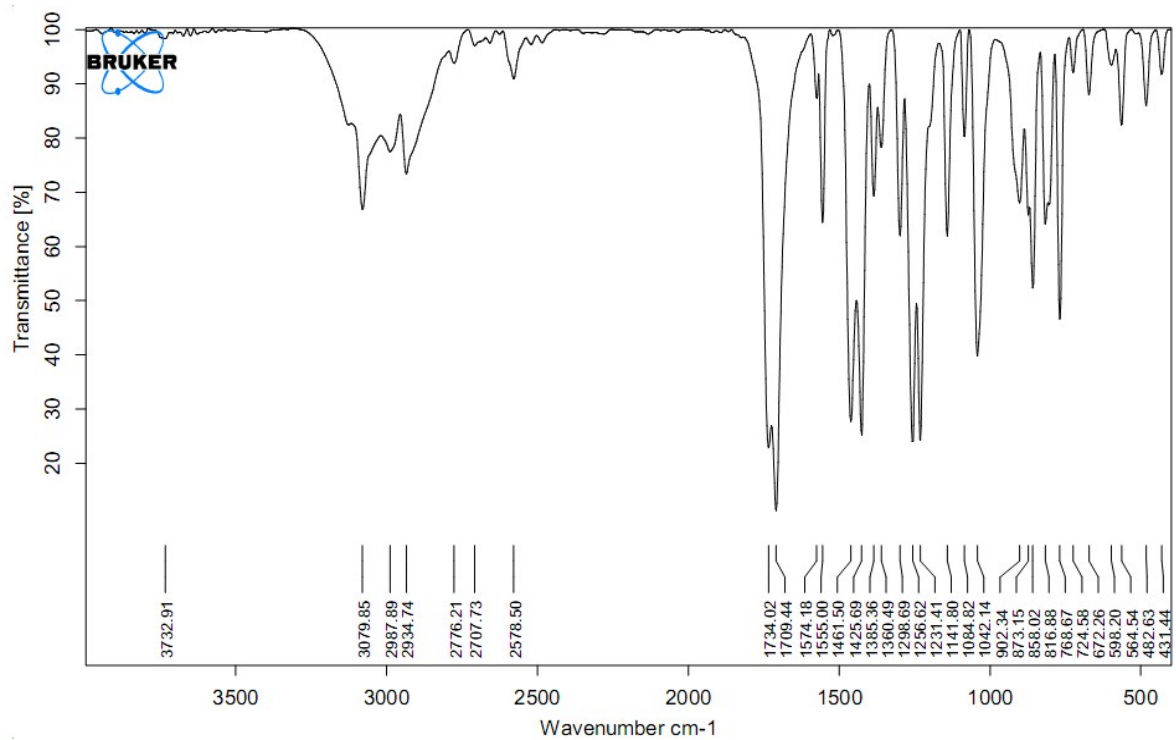

### $^1\text{H}$ NMR spectra of **HCPA**

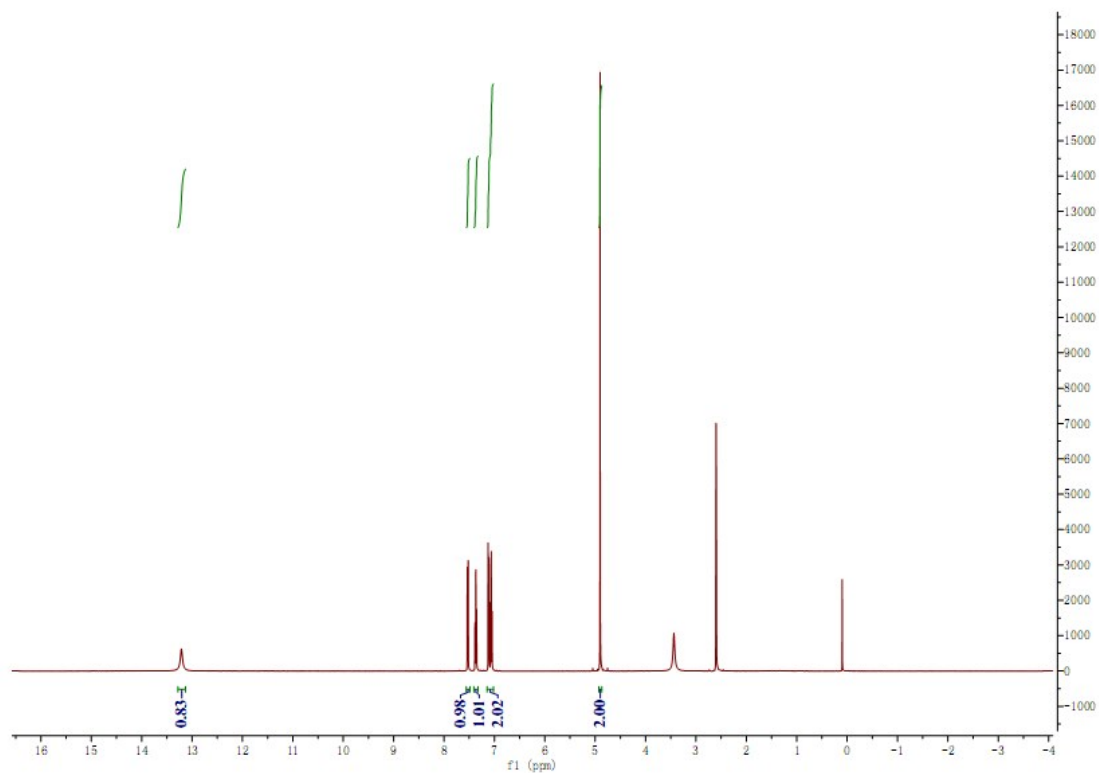

### $^1\text{H}$ NMR spectra of **HMCPA**

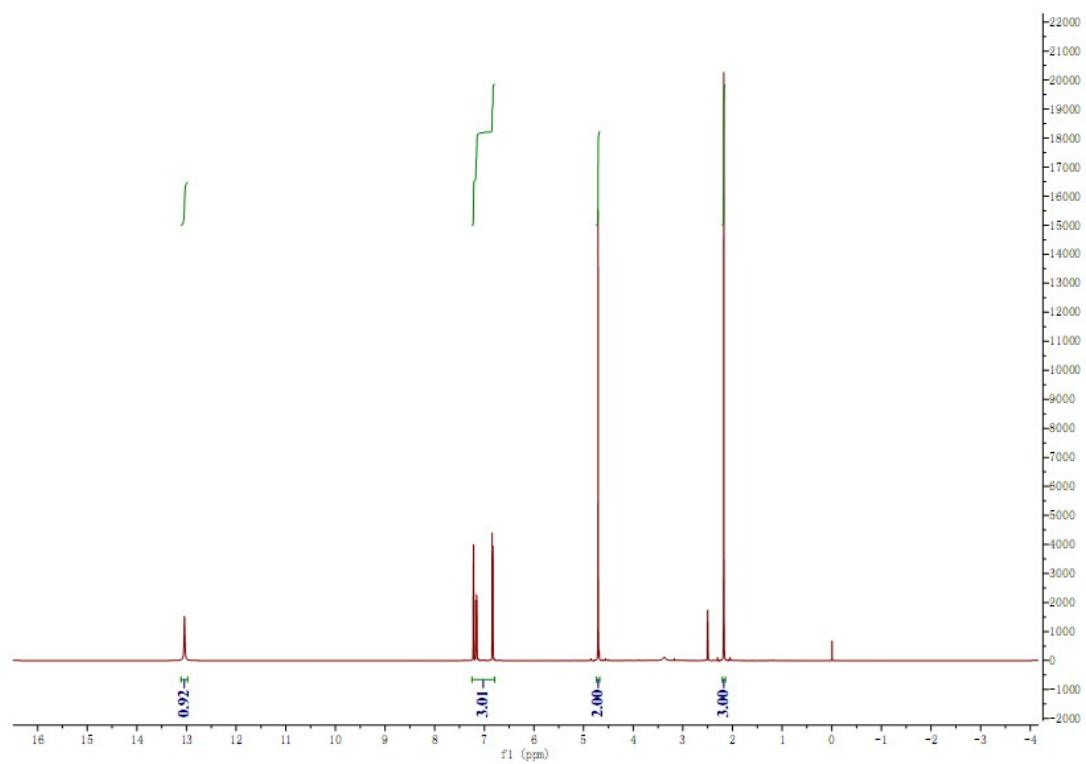



# <sup>1</sup>H NMR spectra of **HDCPA**

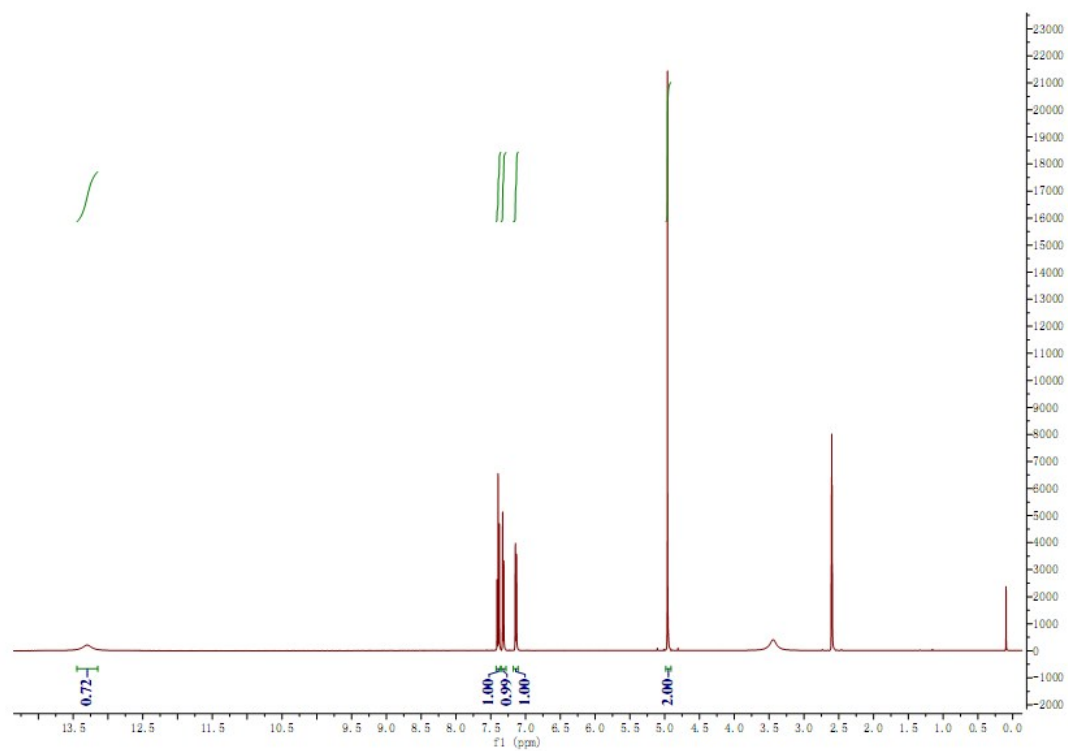

# <sup>1</sup>H NMR spectra of **HTCPA**

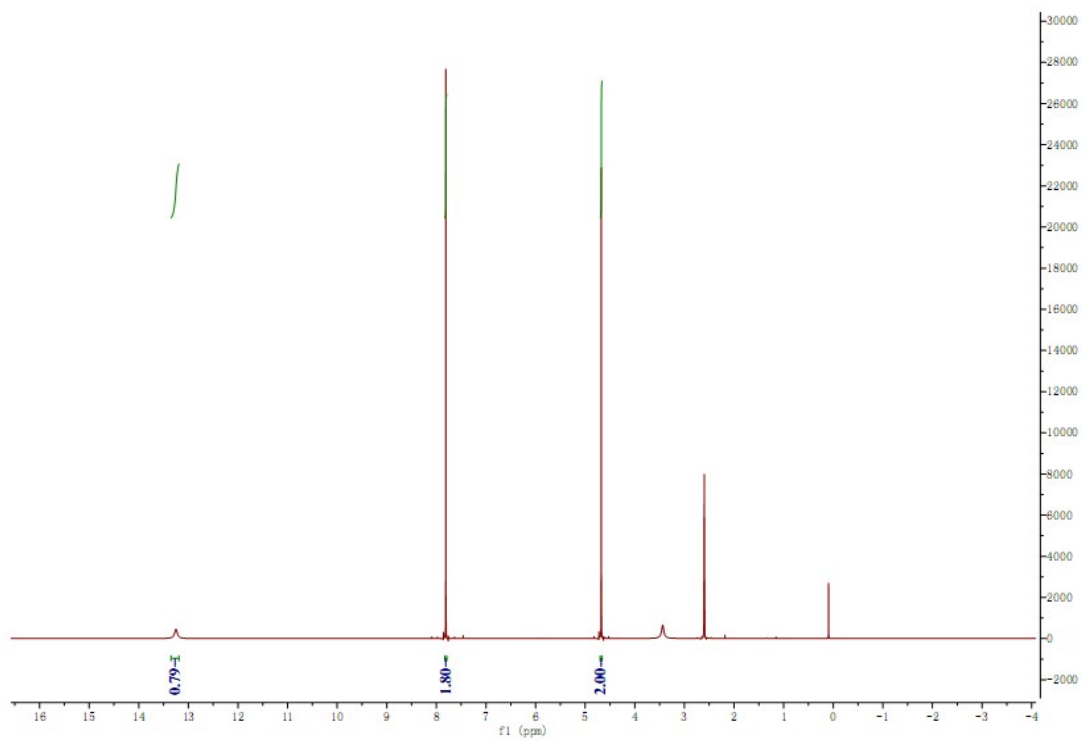

Supplement: c6ra09589e1.pdf [file c6ra09589e1.pdf]
